# Supplementary material for: Deterioration of glomerular endothelial surface layer induced by oxidative stress is implicated in altered permeability of macromolecules in Zucker fatty rats
Source: PubMed Central journal article supplement — Diabetologia. 2010 Jun 6;53(9):2056–65. doi: 10.1007/s00125-010-1810-0 (PMC2910881; doi:10.1007/s00125-010-1810-0), 2010-06-06
Supplement: 125_2010_1810_MOESM1_ESM.pdf [file 125_2010_1810_MOESM1_ESM.pdf]

### Electronic supplementary material

**Table 1** Sequences of primers and probes used for real-time quantitative polymerase chain reaction

| Gene                | Accession number | Primer and TaqMan probe sequences                                                                                                                            |
|---------------------|------------------|--------------------------------------------------------------------------------------------------------------------------------------------------------------|
| Rat <i>gp91phox</i> | NM_023965        | Forward primer; 5'-AAAGGAGTGCCCAGTACCAAAGT-3'<br>Reverse primer; 5'-TACAGGAACATGGGACCCACGAT-3'<br>TaqMan probe; 5'-FAM-CCGGAAACCCTCCTATGACTTGGAAATG-TAMRA-3' |
| Rat <i>p67phox</i>  | NM_001100984     | Forward primer; 5'-CAGACCCAAAACCCAGAAA-3'<br>Reverse primer; 5'-CGGCACAAAGCCAAACAAT-3'<br>TaqMan probe; 5'-FAM-CTCTGGAAGGTGAGGCACACCGC-TAMRA-3'              |
| Rat heparanase      | NM_022605        | Forward primer; 5'-AAAGGAGTGCCCAGTACCAAAGT-3'<br>Reverse primer; 5'-TACAGGAACATGGGACCCACGAT-3'<br>TaqMan probe; 5'-FAM-CCGGAAACCCTCCTATGACTTGGAAATG-TAMRA-3' |
| Human heparanase    | NM_006665        | Forward primer; 5'-ATGCTCAGTTGCTCCTGGAC-3'<br>Reverse primer; 5'-TAACTGCGACCCATTGATGA-3'<br>TaqMan probe; 5'-FAM-CATTTCTTGGGAAGTACTAGGCAATGAACC-TAMRA-3'     |

FAM, 6-carboxyfluorescein; TAMRA, *N,N,N',N'*-tetramethyl-6-carboxyrhodamine derivative
